# Supplementary material
Source: PubMed Central journal article supplement (PMC4960450)

# Expression of human APP across mouse strains

## Entorhinal Cortex

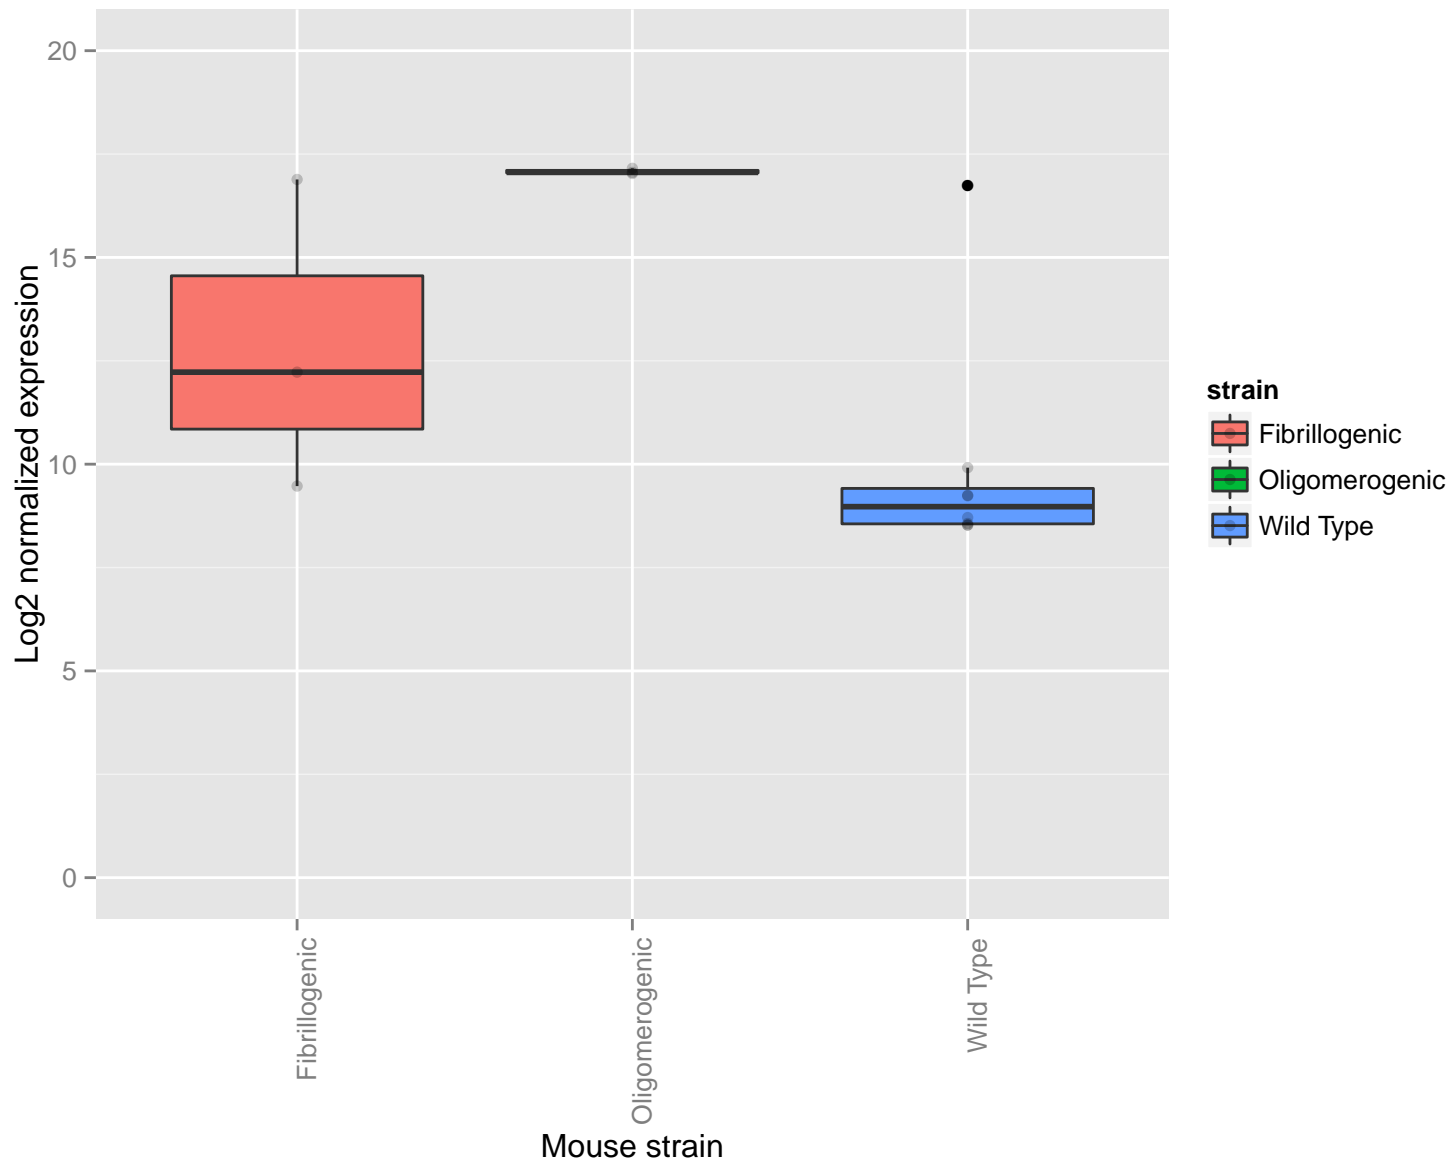

Supplement: mp2015167x1.pdf [file mp2015167x1.pdf]

# Expression of human APP across mouse strains

## Dentate Gyrus

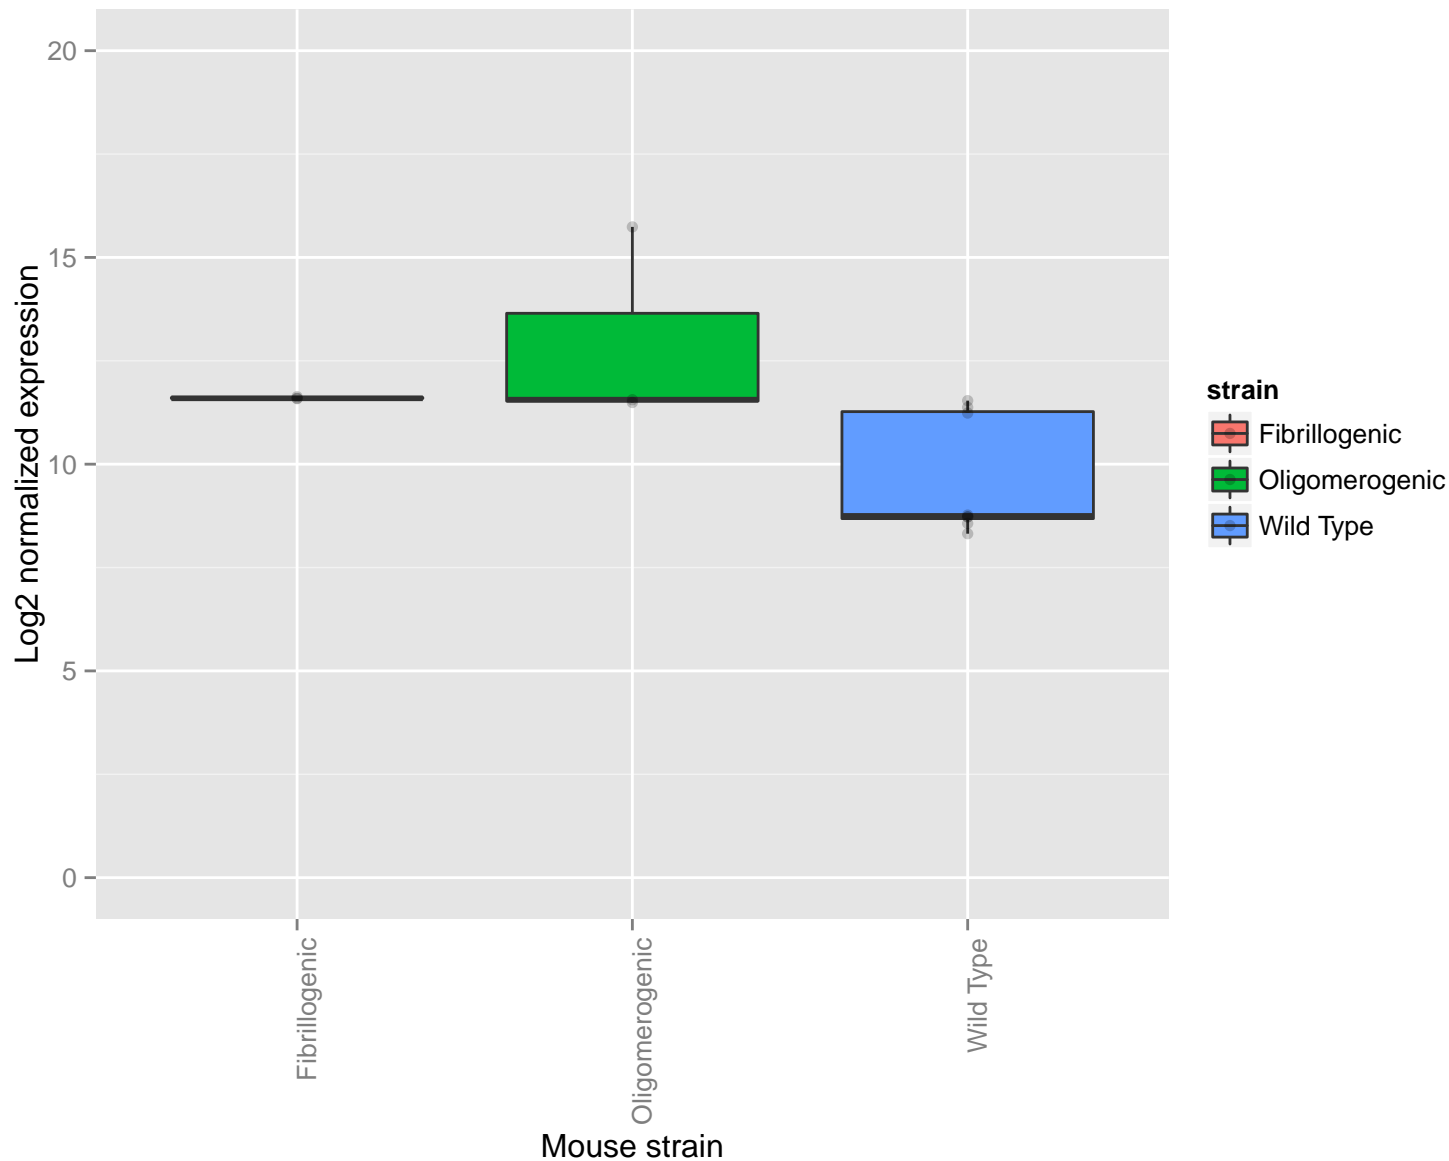

Supplement: mp2015167x2.pdf [file mp2015167x2.pdf]

a

Oligomerogenic  
Cor= 0.95

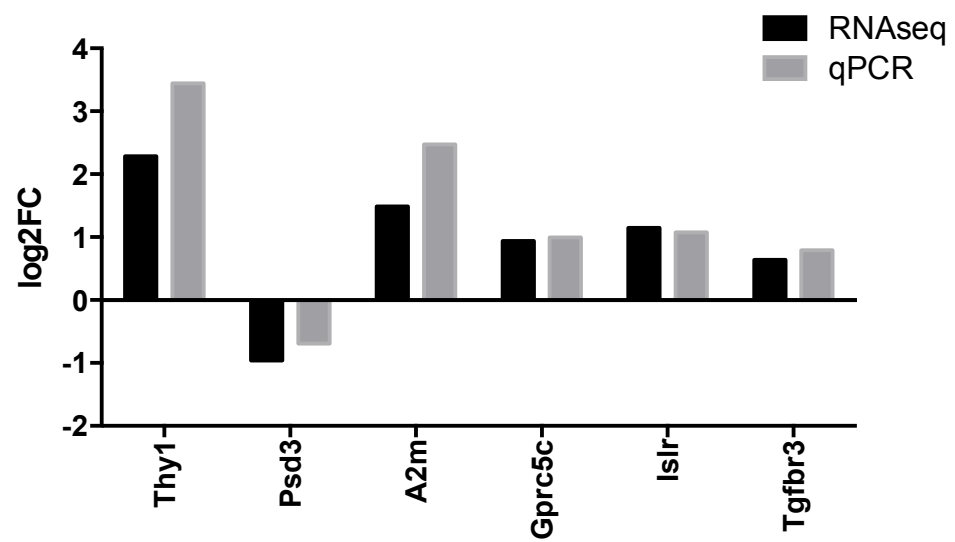

Supplement: mp2015167x3.pdf [file mp2015167x3.pdf]

**b**

**Fibrillogenic**  
Cor= 0.62

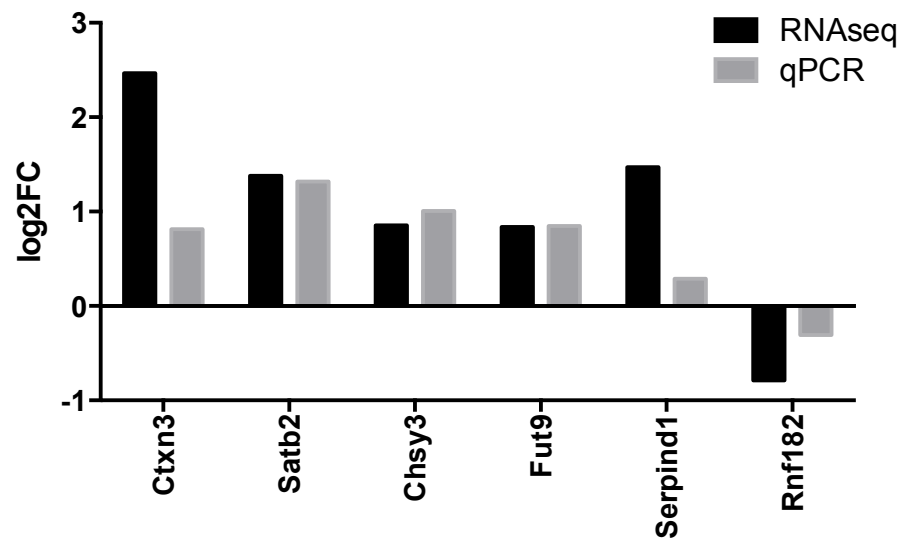

Supplement: mp2015167x4.pdf [file mp2015167x4.pdf]
